## 1 Nasopharyngeal Angiotensin Converting Enzyme 2 (ACE2) Expression as a Risk-Factor 2 for SARS-CoV-2 Transmission in Concurrent Hospital Associated Outbreaks

3  
4 Aidan M. Nikiforuk<sup>1,4</sup>, Kevin S. Kuchinski<sup>1,2</sup>, Katy Short<sup>3</sup>, Susan Roman<sup>3</sup>, Mike A. Irvine<sup>1</sup>,  
5 Natalie Prystajecky<sup>1,2</sup>, Agatha N. Jassem<sup>1,2</sup>, David M. Patrick<sup>1,4</sup> and Inna Sekirov<sup>1,2</sup>

6  
7 <sup>1</sup> British Columbia Centre for Disease Control, Vancouver, BC V5Z 4R4, Canada

8 <sup>2</sup> Department of Pathology and Laboratory Medicine, University of British Columbia,  
9 Vancouver, BC V6T 1Z4, Canada

10 <sup>3</sup> Fraser Health Authority, New Westminster, BC V3L 3C2, Canada

11 <sup>4</sup> School of Population and Public Health, University of British Columbia, Vancouver, BC V6T  
12 1Z4, Canada

13 <sup>5</sup> Faculty of Health Sciences, Simon Fraser University, Burnaby, BC V5A 1S6, Canada

### 14 15 16 **Abstract:**

17  
18 *Background:* Widespread human-to-human transmission of the severe acute respiratory  
19 syndrome coronavirus two (SARS-CoV-2) stems from a strong affinity for the cellular receptor  
20 angiotensin converting enzyme two (ACE2). We investigate the relationship between a patient's  
21 nasopharyngeal ACE2 transcription and secondary transmission within a series of concurrent  
22 hospital associated SARS-CoV-2 outbreaks in British Columbia, Canada.

23  
24 *Methods:* Epidemiological case data from the outbreak investigations was merged with public  
25 health laboratory records and viral lineage calls, from whole genome sequencing, to reconstruct  
26 the concurrent outbreaks using infection tracing transmission network analysis. ACE2  
27 transcription and RNA viral load were measured by quantitative real-time polymerase chain  
28 reaction. The transmission network was resolved to calculate the number of potential secondary  
29 cases. Bivariate and multivariable analyses using Poisson and Negative Binomial regression  
30 models was performed to estimate the association between ACE2 transcription the number of  
31 SARS-CoV-2 secondary cases.

32  
33 *Results:* The infection tracing transmission network provided  $n = 76$  potential transmission  
34 events across  $n = 103$  cases. Bivariate comparisons found that on average ACE2 transcription did  
35 not differ between patients and healthcare workers ( $P = 0.86$ ). High ACE2 transcription was  
36 observed in 98.6% of transmission events, either the primary or secondary case had above  
37 average ACE2. Multivariable analysis found that the association between ACE2 transcription and  
38 the number of secondary transmission events differs between patients and healthcare workers. In  
39 health care workers Negative Binomial regression estimated that a one unit change in ACE2  
40 transcription decreases the number of secondary cases ( $B = -0.132$  (95%CI: -0.255 to -0.0181)  
41 adjusting for RNA viral load. Conversely, in patients a one unit change in ACE2 transcription  
42 increases the number of secondary cases ( $B = 0.187$  (95% CI: 0.0101 to 0.370) adjusting for  
43 RNA viral load. Sensitivity analysis found no significant relationship between ACE2 and  
44 secondary transmission in health care workers and confirmed the positive association among  
45 patients.

47 *Conclusion:* Our study suggests that *ACE2* transcription has a positive association with SARS-  
48 CoV-2 secondary transmission in admitted inpatients, but not health care workers in concurrent  
49 hospital associated outbreaks, and it should be further investigated as a risk-factor for viral  
50 transmission.

51  
52 **Keywords:** ACE2, SARS-CoV-2, Infection Tracing, Transmission Network, Outbreak  
53 Investigation, Multivariable Analysis, Poisson Regression Model, Negative Binomial Regression  
54

## 55 **Introduction:**

56 The severe acute respiratory syndrome coronavirus 2 (SARS-CoV-2) causes potentially  
57 life threatening lower respiratory and systemic inflammatory disease defined as COVID-19[1–3].  
58 SARS-CoV-2 has spread widely since late 2019 causing a global pandemic. Two previous public  
59 health emergencies have provided the opportunity to study human-to-human transmission of  
60 pathogenic coronaviruses. In 2003, the severe acute respiratory syndrome emerged infecting  
61 eight-thousand four-hundred and twenty-two people [4]. In 2012 and 2015 the Middle East  
62 respiratory syndrome coronavirus (MERS-CoV) caused epidemics in the Kingdom of Saudi  
63 Arabia and South Korea with two-thousand five hundred and sixty-two laboratory confirmed  
64 cases reported to the World Health Organization[5]. SARS- and MERS-CoV spread  
65 predominately in health care settings and community spread was controlled by public health  
66 interventions or self-limited[4,5]. The transmission pattern of SARS-CoV-2 contrasts that of the  
67 other pathogenic coronaviruses (SARS-CoV and MERS-CoV). SARS-CoV-2 has predominately  
68 spread within the community, the virus has evolved to become more infectious over time and  
69 vaccination does not protect against re-infection or transmission of newer strains [6].  
70 Transmission of respiratory viruses like SARS-CoV-2 involves a complex interplay of social,  
71 environmental, and biological variables[7]. Numerous observational studies have described risk  
72 factors of SARS-CoV-2 transmission across a variety of settings including hospitals[8],  
73 households[9], and schools[10,11]. Cumulative evidence suggests that the increased human-to-  
74 human transmissibility of SARS-CoV-2 in comparison to SARS-CoV stems from stronger  
75 affinity for the primary host receptor angiotensin converting enzyme 2 (ACE2)[12–14]. SARS-  
76 CoV-2 binds to ACE2 through its spike glycoprotein, the spike protein undergoes proteolytic  
77 cleavage before binding with ACE2 prompting endocytosis and membrane fusion[13]. The  
78 Omicron variant of SARS-CoV-2 has a stronger affinity for ACE2 and less reliance on host  
79 proteases biasing cell entry towards endocytosis, consequently less cell fusion and syncytia  
80 formation occurs[15]. ACE2 is highly expressed in the upper and lower respiratory tract,  
81 upregulation may occur in response to stimulation with interferon[16]. SARS-CoV-2 exploits  
82 upregulation of *ACE2* in an interferon rich environment (like the early stages of an innate  
83 immune response) to spread from cell-to-cell producing a high viral titre[17]. In the later stages  
84 of replication, SARS-CoV-2 downregulates *ACE2*, preventing any benefits to the host mediated  
85 by interferon stimulated upregulation[18,19]. SARS-CoV-2 has a shifting relationship with  
86 ACE2 and like viral load, ACE2 expression fluctuates through the course of viral infection[20–  
87 22]. Regardless, SARS-CoV-2 replicates most efficiently in tissues rich with ACE2, the strong  
88 positive association between viral load and ACE2 expression at the time of diagnostic testing  
89 increase the degree of viral shedding and thereby, the risk of ongoing transmission [23].  
90

91 To understand the role of *ACE2* expression in SARS-CoV-2 transmission, we conducted  
92 an infection tracing network analysis of positive testers in concurrent, single-site, hospital

93 associated COVID-19 outbreaks in British Columbia during late 2020 and early 2021. The study  
94 aims to: (i) describe the outbreaks in context of person, place, and time, (ii) visualize an infection  
95 tracing transmission network to infer the number of secondary cases per primary case and (iii)  
96 quantify the relationship between the number of potential secondary cases (outcome) and  
97 nasopharyngeal transcription of transmembrane ACE2 (exposure) while adjusting for viral RNA  
98 load, and interaction by case designation (patient or healthcare worker). We build from previous  
99 work which demonstrated no relationship between transmembrane nasopharyngeal ACE2  
100 transcription and age, biological sex or *TMPRSS2* transcription in a sample of COVID-19  
101 negative persons[23]. This study contributes novel evidence of how nasopharyngeal ACE2  
102 transcription may drive SARS-CoV-2 transmission and highlights the potential role of  
103 respiratory masks and infection prevention and control measures in limiting the viruses'  
104 nosocomial spread.

105

## 106 **Methods:**

107

### 108 *Study Design and Participants:*

109 We conducted surveillance for COVID-19 cases in a British Columbian hospital over a  
110 series of outbreaks, from declaration of the first facility associated outbreak on 07-11-2020 to the  
111 date the last outbreak was declared over on 04-01-2021 (dd-mm-yyyy). Participants included  
112 patients and health care workers who tested positive for COVID-19 upon self-reporting or  
113 showing indicative symptoms (e.g. fever, fatigue, cough and loss of taste or smell) or through  
114 asymptomatic point prevalence testing during the outbreak investigations. Inclusion criteria were  
115 applied to select study participants whose diagnostic specimens were tested centrally at the  
116 British Columbia Center for Disease Control Public Health Laboratory, underwent SARS-CoV-2  
117 whole genome sequencing, and had adequate remaining volume of nucleic acid extract to assay  
118 ACE2 transcription. In the case that a participant was tested for COVID-19 more than once, their  
119 first diagnostic specimen from the study period was sampled. Participants who met the inclusion  
120 criteria (n = 202) were excluded from the study if their specimen collection container was not  
121 identifiable (n = 22), whole genome sequencing failed and was not able to classify the viral  
122 lineage (n = 63) or ACE2 transcription was unmeasurable (n = 14) (Figure S1). An analytic  
123 dataset of n= 103 participants was used for analysis. Demographic variables of age, biological  
124 sex, case description (patient or health care worker) and site of infection/ site of transmission  
125 (hospital unit) were drawn from public health laboratory data or the outbreak report of the  
126 investigating epidemiologist. Outbreaks were defined by the presence of one or more confirmed  
127 cases of COVID-19 which were epidemiologically linked within hospital units (Table S3). The  
128 laboratory procedures were performed in a laboratory accredited by the College of American  
129 Pathologists and BC's Diagnostic Accreditation Program using validated RT-qPCR and whole  
130 genome sequencing protocols[24–26].

131

### 132 *Ethics Statement:*

133 Ethical approval for the study was sought from the University of British Columbia human  
134 ethics board (#H20-01110) which was harmonized with the Fraser Health Authority. Written  
135 informed consent was not required. All data was de-identified prior to analysis and the results  
136 were not linked back to any identifying records. This study was deemed as minimal risk to the  
137 participants involved. To ensure privacy the site of the outbreak series will not be disclosed.

138

139

140 *Procedures:*

141 Participant's diagnostic specimens were collected by nasopharyngeal swab and stored in  
142 Universal Transport Medium™ (UTM®) (COPAN) and stored at 4°C before RNA extraction.  
143 RNA extraction was performed on the MagMAX-96™ platform with the Viral RNA isolation kit  
144 (ThermoFisher). Host and viral gene transcription was assayed by quantitative real-time  
145 polymerase chain reaction (RT-qPCR) on the Applied Biosystems 7500 Real-Time PCR  
146 platform using TaqMan FastVirus 1-step polymerase (ThermoFisher). Reaction volumes were 20  
147 µl, with 5 µl of RNA template, 1 µl of 20X primer/probe, 5 µl FastVirus and 9 µl of nuclease free  
148 water. Cycling conditions were set to: 50°C for 5min, 95°C for 20s followed by 40 cycles of  
149 95°C for 15s and 60°C for 1 min. As previously described, multiplex RT-qPCR reactions were  
150 used to detect host (*ACE2*, *GAPDH*, *RNaseP*) and viral (*E* gene) transcription[27]. Participants  
151 were diagnosed COVID-19 positive with an *E* gene cycle threshold value < 38 and a *RNaseP*  
152 gene cycle threshold value < 40. The *E* gene Ct values were transformed to genome equivalents  
153 per millilitre using a standard curve of SARS-CoV-2 synthetic RNA (MN908947.3) (Twist  
154 Bioscience)[23]. Relative gene transcription for *ACE2* was calculated in proportion to the  
155 control gene *GAPDH* using the  $2^{-\Delta\Delta Ct}$  method[28]. SARS-CoV-2 whole genome sequencing was  
156 performed on all diagnostic specimens which tested positive for SARS-CoV-2 by RT-qPCR.  
157 Viral genomes were amplified using a 1200bp amplicon scheme and sequenced on an Illumina  
158 NextSeq instrument[24]. Genome assembly was performed via a modified ARTIC Nextflow  
159 pipeline[29]. Quality control did not pass any genomes with < 85% completeness or < 10X depth  
160 of coverage. Viral lineages were assigned using the PANGOLIN tool (Version 1.15.1)[30]. All  
161 molecular and genomic testing was performed at the BCCDC-PHL.

162

163

164 *Variable Definition:*

165 Demographic variables of interest were drawn from public health laboratory data, or the  
166 outbreak reports provided by the investigating epidemiologist. The measures included in the  
167 study are age, biological sex, case description, diagnostic specimen collection date (dd-mm-  
168 yyyy), SARS-CoV-2 *E* gene cycle-threshold (Ct) value, *ACE2* gene transcription, SARS-CoV-2  
169 lineage (PANGO lineage), site of transmission (hospital unit) and site of infection (hospital unit).  
170 Age, *E* gene Ct value (transformed to log<sub>10</sub> GE/mL[23]) and *ACE2* gene transcription are  
171 continuous numeric variables. Biological sex, case description, viral lineage, collection date and  
172 site of transmission/infections are categorical variables. We assumed that collection date equals  
173 date of symptom onset for this study because once the hospital declared an outbreak, patients and  
174 health care workers were required to be tested at the onset of symptoms. *ACE2* gene  
175 transcription was transformed to a categorical value using the mean transcription value ( $X_{\square} =$   
176 0.00, SD = 1.08) of COVID-19 negative testers, from a previous study which collected a random  
177 sample of n = 212 nasopharyngeal specimens in British Columbia during 2020[23]. The number  
178 of potential secondary cases per primary case was determined by infection tracing transmission  
179 network analysis. *ACE2* gene transcription and number of potential secondary cases are the  
180 exposure and outcome of interest. Viral load and case description were included in multivariable  
181 analysis because, they meet the definition of a confounder and are a common cause of the  
182 exposure (*ACE2* gene transcription) and outcome (number of secondary cases)[31]. Viral load  
183 and *ACE2* gene transcription share a strong positive association, people with high *ACE2* gene  
184 transcription were found to have high viral loads[32]. Viral load relates to transmission in that

185 people with high viral loads may shed more infectious virus[33,34]. Case description (patient or  
186 healthcare worker) relates to *ACE2* gene transcription because patients may have comorbidities  
187 or receive medications which affect *ACE2* transcription[35]. Health care workers have additional  
188 social connections relative to in-patients, as they can leave work and be exposed to SARS-CoV-2  
189 outside of clinical areas or in the community[8].

190

191 *Statistical Analysis:*

192

193 Descriptive Statistics:

194 The analytic data (n = 103) was used for bivariate analysis. The variables of interest were  
195 stratified by case description and categorical *ACE2* transcription. An epidemiological curve was  
196 visualized for the series of concurrent hospital outbreaks from 07-11-2020 to 04-01-2021 (dd-  
197 mm-yyyy). Parametric statistical tests were used given the large sample size of our study[36].

198

199 Infection Tracing Network Analysis:

200 A matrix of all possible transmission pairs was permuted using SARS-CoV-2 lineage  
201 classifications, for two cases to form a pair they had to share the same lineage. SARS-CoV-2  
202 lineages circulating in the hospital were diverse enough that the minimal difference of single  
203 nucleotide polymorphisms between them was unlikely to have occurred by mutation during a  
204 single transmission event, suggestion multiple independent introductions (Table S4). Four  
205 assumptions (i-iv) were used to select potential transmission pairs from all possible  
206 permutations. The first assumption (i) stipulated that specimen collection date (symptom onset  
207 date) of the primary case was before that of the secondary case. The second assumption (ii)  
208 affirms that the primary case's unit of transmission equals the secondary case's unit of infection.  
209 The third assumption (ii) holds that the collection date of the secondary case is at least one-serial  
210 interval (5 days) from that of the primary case[37]. The fourth assumption (iv) dictates that the  
211 collection date of the secondary case is not more than three-serial intervals (15 days) from the  
212 primary case[38]. Potential transmission pairs, which met the four-assumptions, were stratified  
213 by categorical *ACE2* transcription (High/Low) or viral lineage and plotted overtime.

214

215 Primary Analysis:

216 Multivariable analysis was performed to estimate the relationship between *ACE2*  
217 transcription and number of secondary cases using a Poisson generalized linear regression  
218 model. Variable importance was assessed conceptually using the common cause criterion and  
219 statistically by the partial F-test. Collinearity was measured using the variable inflation factor,  
220 variables with a value greater than five were excluded[39]. Effect modification terms were  
221 included if they were statistically significant and supported conceptually. The two assumptions  
222 of Poisson models; overdispersion and zero inflation were checked using a ratio of residual  
223 deviance to degrees of freedom (theta)[40] and the score test[41], respectively. If the specified  
224 Poisson model failed to meet either of these assumptions than an alternative quasi-Poisson or  
225 Negative Binomial (NB) model was tested, and the assumptions re-examined. Model fit was  
226 measured by the Akaike information criterion[42].

227

228

229 Sensitivity Analysis:

230 Sensitivity analysis was performed to measure the impact of assumptions (ii, iii and iv)  
231 used to construct the transmission network on the relationship between *ACE2* transcription and  
232 number of secondary cases. The assumptions were excluded independently, and the transmission  
233 network was iteratively reconstructed with (n-1) assumptions. Additionally, the fourth  
234 assumption (iv) was challenged by changing the infectious period from 15 days (three serial  
235 intervals) to 10 days (two serial intervals). The number of secondary cases was computed for  
236 each transmission network and used in multivariable analysis.

237 Statistical analysis was performed in R version 4.04 using the packages: readxl,  
238 tidyverse, dataexplorer, ggpubr, car, ggsci, stringr, tableone, rio, remotes, lubridate, dplyr,  
239 epicontacts, AER, devtools, rlang, DHARMA, MASS, pscl, epiR, EpiCurve[43].

240  
241

## 242 **Results:**

243

### 244 Descriptive Statistics:

245 The analytic dataset contains (n = 103) cases of COVID-19 associated with a single-site  
246 concurrent series of hospital outbreaks from 07-11-2020 to 04-01-2021 (dd-mm-yyyy) in British  
247 Columbia, Canada. Participant characteristics are displayed in Table 1, where the variables of  
248 interest are stratified by case description (Patients or Health Care Workers) (Table 1). The  
249 bivariate relationship between variables and categorical *ACE2* transcription was also investigated  
250 (Table S1). Most cases occurred in patients n = 57 (55%), while n = 48 infections were observed  
251 in health care workers (45%). The mean age of patients associated with the hospital outbreaks  
252 was 78.61 years, health care workers were significantly younger with a mean age of 41.11 years  
253 (P < 0.001). Most of the healthcare workers (n = 41, 89%) and patients were biologic females (n  
254 = 33, 58%). *ACE2* transcription and viral load did not differ between case descriptions (P = 0.86,  
255 P = 0.30). Six SARS-CoV-2 lineages were characterized by whole genome sequencing, two of  
256 which did not have more than one case (B.1.128 and B.1.36.38). The highest proportion of  
257 observed SARS-CoV-2 infections were either SARS-CoV-2 lineage AL.1 (n = 56) or B.1.2 (n =  
258 40) (Table 1), these two lineages have at least a five SNP difference between them (Table S4).

259

260 An epidemiological curve was made to show the incidence of positive testers per week  
261 over the course of the hospital associate outbreaks. The outbreaks spanned ten epidemiological  
262 weeks (Week-#45-2020 to Week-#1-2021) and possesses a non-normal distribution (Figure 1A  
263 & B). We are cautious to directly interpret the incidence curve as infection prevention and  
264 control practices implemented during the outbreaks (like point prevalence testing and stoppage  
265 of admissions) likely biases the observed incidence of SARS-CoV-2 cases overtime. A first peak  
266 in cases occurred on Week #46-2020 and a second on Week #52-2020. In the first phase of the  
267 outbreaks, many cases occurred on the second floor of the hospital in units 2A, 2B and 2C. Later  
268 transmission was predominately observed on floors four or five in units 4B, 4C, 4D and 5A  
269 (Figure 1A). Multiple introductions of SARS-CoV-2 into the hospital environment occurred over  
270 the surveillance period; however, timely and effective infection prevention and control measures  
271 limited transmission of several variants like B.1.36.38, B.1.128 and B.1.279 (Table S3, Figure  
272 S2).

273

### 274 Transmission Network:

275           Permuting all possible transmission pairs in which the primary and secondary case share  
276 the same SARS-CoV-2 lineage yielded  $n = 9389$  combinations. Applying the first assumption (i)  
277 filtered the possible transmission pairs to  $n = 2167$ . The second assumption (ii) eliminated  
278 another  $n = 1480$  possible pairs for a total of  $n = 687$ . The third and fourth assumptions restricted  
279 the possible pairs to  $n = 382$  and  $n = 76$ , respectively. A directed transmission network was  
280 constructed from  $n = 103$  cases with  $n = 76$  contacts. The network captures  $n = 55$  transmission  
281 events for viral lineage AL.1 and  $n = 39$  for B.1.2; transmission of the other viral lineages was  
282 either too low (only one case reported) or did not meet the assumption criteria (Figure 2B). The  
283 nodes of the transmission network are shown stratified by categorical *ACE2* transcription level  
284 (Low or High) (Figure 2A). The distribution of *ACE2* transcription among hospital associated  
285 cases was tested with a single sample proportion test, 82% of cases had above average *ACE2*  
286 transcription (84/103,  $P < 0.001$ ). Transmission pairs were further stratified into primary ( $n = 34$ )  
287 and secondary cases ( $n = 28$ ). Primary cases possessed predominately high *ACE2* transcription  
288 (29/34,  $P < 0.001$ ). *ACE2* transcription was similarly enriched in secondary cases (23/28,  
289  $P < 0.01$ ). Overall, 98.6% of transmission events involved at least one case with high *ACE2*  
290 transcription (Table S2).

291

#### 292 Primary Analysis:

293           Multivariable NB regression estimated that a one-unit change in *ACE2* transcription  
294 decreases the number of secondary cases in health care workers by -0.13 (95%CI: -0.255 to -  
295 0.0181) adjusting for RNA viral load and case description (Table 2). Effect modification was  
296 observed between *ACE2* transcription and case description; in patients, a one-unit change in  
297 *ACE2* increased the number of secondary cases by 0.187 (95% CI: 0.0101 to 0.370). Therefore, a  
298 5 unit increase in *ACE2* transcription may lead to approximately one more SARS-CoV-2  
299 secondary case per primary patient case. Poisson and quasi-Poisson regression models were  
300 constructed using the same variables, neither provided a better fit to the NB option (Table 2).

301

#### 302 Sensitivity Analysis:

303           A sensitivity analysis was performed to measure the impact of assumptions ii, iii and iv  
304 on construction of the transmission network and number of secondary cases. The first  
305 assumption- that the symptom onset date of the primary case occurs before the secondary case-  
306 was not included in the sensitivity analysis, as breaking this assumption would make the  
307 secondary case the primary case. Omission of the second assumption (ii), so that the primary  
308 case did not share a hospital unit with the secondary case, increased the number of possible  
309 transmission pairs to  $n = 538$  (Figure S3). The network was not clearly resolved and no  
310 significant relationship between *ACE2* transcription and the number of secondary cases was  
311 estimated using a Poisson ( $B = -0.17$  [95%CI: -0.903 to 0.558],  $P = 0.64$ ) or NB regression model  
312 ( $B = -0.01$  [95%CI: -0.082 to 0.0613],  $P = 0.8$ ) (Figure 3). Both models had a worse fit than  
313 when used in the primary analysis (Poisson<sub>AIC</sub> = 705 and NB<sub>AIC</sub> = 691). Leaving out the third  
314 assumption (iii), to appreciate that the secondary case could have been infected in less time than  
315 the average serial interval, increased the number of possible transmission pairs to  $n = 246$  (Figure  
316 S4). A significant relationship between *ACE2* transcription and the number of secondary cases  
317 was estimated using a Poisson ( $B = -0.60$  [95%CI: -1.08 to -0.125],  $P = 0.015$ ) and NB  
318 regression model ( $B = -0.11$  [95%CI: -0.215 to -0.0189],  $P = 0.03$ ) (Figure 3). However, neither  
319 model fit better than when used in the primary analysis (Poisson<sub>AIC</sub> = 618 and NB<sub>AIC</sub> = 551). Re-  
320 analysis without the fourth assumption that the infectious period of SARS-CoV-2 does not

321 eclipse 15 days increased the possible transmission pairs to  $n = 158$  (Figure S5), no significant  
322 relationship between *ACE2* transcription and the number of secondary cases was estimated using  
323 a Poisson ( $B = 0.0143$  [95%CI: -0.284 to 0.313],  $P = 0.64$ ) or NB regression model ( $B = 3.90 \times$   
324  $10^{-3}$  [95%CI: -0.0849 to 0.0911],  $P = 0.8$ ) (Figure 3). Additionally, assumption four (iv) was  
325 challenged by decreasing the infectious period to 9.5 days or  $\sim 2$  serial intervals (Figure S6,  
326 transmission pairs  $n = 48$ ). Applying a shorter infectious period provided the following estimates  
327 using a Poisson ( $B = -0.270$  [95%CI: -0.454 to -0.0852],  $P = 0.00$ ) and NB regression model ( $B$   
328  $= -0.160$  [95%CI: -0.324 to -0.0118],  $P = 0.09$ ) (Figure 3). Importantly, the effect modification  
329 term was significant in the NB model, and it provided a better fit than when used in the primary  
330 analysis (AIC = 269). In patients a one-unit change in *ACE2* transcription increases the number  
331 of secondary cases by 0.268 (95% CI: 0.0315 to 0.518,  $P = 0.04$ ), when adjusting for RNA viral  
332 load (Figure 3).

333

### 334 **Discussion:**

335 This study describes case-to-case transmission within a series of hospital associated  
336 SARS-CoV-2 outbreaks in British Columbia during late 2020 and early 2021. We used a  
337 combination of epidemiological data from outbreak reports, laboratory measurements of *ACE2*,  
338 and SARS-CoV-2 lineages derived from whole genome sequencing to recreate the outbreaks  
339 using infection tracing transmission network analysis[44]. The transmission network was  
340 resolved to provide the possible number of transmission events (secondary cases) per primary  
341 case. Bivariate and multivariable analysis was employed to estimate the relationship between  
342 nasopharyngeal *ACE2* transcription and the number of potential secondary cases.

343 Bivariate analysis found that nasopharyngeal *ACE2* transcription did not differ between  
344 patients and health care workers. However, *ACE2* transcription was enriched in cases, more than  
345 fifty percent of the cases had 'High' *ACE2*. The transmission network constructed with all four  
346 assumptions provided  $n = 76$  transmission events for analysis. The simplest recreation of the  
347 outbreaks was provided by a sensitivity analysis where the fourth assumption (iv) was changed  
348 to stipulate an infectious period of 9.5 days ( $\sim 2$  serial intervals), which yielded  $n = 48$   
349 transmission events. Multivariable analysis with Poisson regression models was inferior to NB  
350 regression as the number of secondary cases was over dispersed. In the primary analysis, NB  
351 regression estimated that a one-unit change in nasopharyngeal *ACE2* transcription decreases the  
352 number of secondary cases in health care workers by  $B = -0.132$  (95%CI: -0.255 to -0.0181,  $P =$   
353  $0.04$ ) and increases transmission in patients by  $B = 0.187$  (95% CI: 0.0101 to 0.370,  $P = 0.04$ ).  
354 Sensitivity analysis using a shorter infectious period of 9.5 days, provided comparable results, no  
355 association was found between nasopharyngeal *ACE2* transcription and SARS-CoV-2  
356 transmission from health care workers ( $P = 0.09$ ). In patients, nasopharyngeal *ACE2* expression  
357 was associated with secondary transmission  $B = 0.27$  (95% CI: 0.0315 to 0.518,  $P = 0.04$ )  
358 adjusting for RNA viral load (Figure 3A & B).

359 Viral transmission exemplifies a complex system where understanding the mechanism of  
360 transmission requires deeper analysis than observing the sum of its components. This  
361 observational study describes nasopharyngeal *ACE2* transcription as a component of SARS-  
362 CoV-2 transmission. In a series of hospital associated outbreaks in British Columbia  
363 nasopharyngeal *ACE2* transcription was positively associated with the number of secondary  
364 cases (ongoing transmission) in patients but not health care workers. The reason for this  
365 difference may stem from health care workers wearing personal protective equipment while  
366 providing care. The Public Health Agency of Canada recommends that health care workers



367 providing care to COVID-19 positive patients, as a minimum, adhere to droplet and contact  
368 precautions [47][45]. If care requires aerosol generating procedures, then the health care worker  
369 dons a N95 respirator with a gown, gloves, and eye protection[45]. Surgical masks and N95  
370 respirators provide a physical barrier between the mucosal membrane of the nasopharyngeal  
371 passage and virus carrying droplets or particles suspended in the air. The design and intended use  
372 of respirators and surgical masks differ. Respirators are designed to prevent inhalation of  
373 airborne particles and must fit tightly to the user's face. Surgical masks are designed to protect  
374 others from aerosolized droplet production from the wearer's upper respiratory system[46]. In  
375 either case, physical barrier provided by a mask can prevent SARS-CoV-2 viral particles from  
376 binding to ACE2 proteins on the surface of host cells and initiating the viral replication cycle.  
377 Masking may not completely prevent exposure to SARS-CoV-2 yet still decreases the infectious  
378 dose below the level necessary for infection[47]. Various studies have demonstrated the utility of  
379 surgical masks and N95 respirators at preventing COVID-19 or infection with other respiratory  
380 pathogens[47–49]. Use of surgical masks and social distancing was associated with a reduction  
381 of 44.9 COVID-19 cases per 1000 students and staff in Boston area school districts. This  
382 reduction represents a 4.49% decrease in the incidence of SARS-CoV-2[50]. A clinical trial  
383 investigating the use of surgical masks or N95 respirators to prevent SARS-CoV-2 infection in  
384 health care workers found no difference in the masks' efficacy to protect from infection[51].  
385 This suggests that when worn by health care workers, surgical masks and N95 respirators have  
386 comparable efficacy to reduce respiratory infections transmitted by small, aerosolized particles  
387 <5  $\mu\text{m}$ . Taken together, this evidence supports the hypothesis that health care workers in our  
388 study were sufficiently protected by their personal protective equipment to negate the association  
389 between nasopharyngeal *ACE2* transcription and secondary transmission. In contrast,  
390 hospitalized patients did not wear PPE while receiving care and nasopharyngeal *ACE2*  
391 transcription possessed a positive association with secondary transmission. The principle of a  
392 mask protecting the wearer from causing transmission instead of protecting contacts from  
393 acquiring infection parallels how high nasopharyngeal *ACE2* transcription in an infected person  
394 may produce more secondary cases. High nasopharyngeal *ACE2* transcription may promote  
395 viral shedding in the upper airway and thus the production of finer aerosols from talking,  
396 singing, or sneezing. Fine aerosols can spread further than the large ones, produced lower in the  
397 respiratory tract, and pose an increased risk of infection to contacts[52]. As PPE use was not  
398 measured in our study competing hypotheses could explain the apparent difference in the  
399 relationship between *ACE2* transcription and transmission among health care workers and  
400 patients. An unmeasured confounding variable present for health care workers but not patients  
401 could bias the relationship between *ACE2* transcription and secondary transmission. For  
402 example, health care workers have variable shift lengths and leave the hospital daily after work;  
403 therefore, their contact time with an infected patient differs from that of an inpatient who shares  
404 the same hospital unit. This example also serves to demonstrate the complexity of measuring  
405 SARS-CoV-2 and other respiratory pathogen's transmission. We acknowledge that SARS-CoV-  
406 2 transmission occurs due to an intricate balance of social, biological, and environmental risk-  
407 factors of which nasopharyngeal *ACE2* transcription may contribute a singular role[7].

408 Regulators of *ACE2* transcription in the lower respiratory tract are well documented a  
409 lesser evidence base exists for the upper respiratory tract. Importantly, upper, and lower airway  
410 *ACE2* transcription are not strongly corelated indicating that they may occur independently of  
411 each other[53]. In previous work we found that nasopharyngeal transcription of *ACE2* did not  
412 differ by age (within adults over the age of eighteen) or biological sex[27], a finding which was

413 further supported by this study. High nasopharyngeal *ACE2* expression has been associated with  
414 long term inhaled corticosteroid use and exposure to fine particulate matter  $PM_{2.5}$ . Below  
415 average, low nasopharyngeal *ACE2* transcription is associated with type 2 inflammation  
416 mediated by the cytokines IL-4, IL-5, and IL-13[54,55]. Therefore, individuals with asthma or  
417 allergic rhinitis may have lower upper airway *ACE2* expression than those that do not. Further  
418 studies are required to understand additional predictors of upper airway *ACE2* expression and if  
419 it relates to that of the lower airway.

420

#### 421 **Strengths and limitations:**

422 The described study has several limitations in design, data collection and analysis.  
423 Sampling cases of SARS-CoV-2 but not their contacts prevented us from constructing a more  
424 robust transmission network[44]. Contact tracing data would benefit our analysis by increasing  
425 power of the study and allow estimation of the relationship between nasopharyngeal *ACE2*  
426 transcription and lack of transmission. Estimating the relationship between nasopharyngeal  
427 *ACE2* transcription and secondary transmission in only confirmed cases may have resulted in  
428 selection bias, where we selected for *ACE2* measurements in persons that had been exposed and  
429 infected by SARS-CoV-2[56]. Sampling from a population of hospitalized patients may also  
430 have introduced Berkson's bias (admission rate bias) into the study and restricts our ability to  
431 generalize the results to other sub-groups or the community[56]. The hospitalized patients could  
432 share an unmeasured exposure, comorbidity or drug treatment which unknowingly affected their  
433 nasopharyngeal *ACE2* transcription. Performing a sensitivity analysis helped us understand the  
434 importance of our assumptions in building the infection tracing transmission network. The  
435 assumption that the primary and secondary case shared the same hospital unit, proved the most  
436 important. Without knowing the place of exposure, the transmission network would not have  
437 resolved transmission pairs. Whole genome sequencing provided limited specificity of  
438 transmission events when the SARS-CoV-2 outbreak was short and genomes were classified by  
439 lineage and not at the resolution of single nucleotide polymorphisms (SNPs). Incorporating SNPs  
440 into the analysis may increase resolution of the transmission network by more accurately  
441 determining transmission pairs. Using RT-qPCR to measure *ACE2* transcription and RNA viral  
442 load overapproximates available *ACE2* protein and viral particles[23]. Future work should aim  
443 to re-estimate the association between nasopharyngeal *ACE2* transcription and secondary cases  
444 using data from a SARS-CoV-2 household transmission study. The design of a household  
445 transmission study has the benefits of selecting participants from a non-hospitalized population,  
446 observing secondary infections and contacts within family clusters in a context with limited use  
447 of personal protective equipment.

448

#### 449 **Conclusion:**

450 We estimate the association between nasopharyngeal *ACE2* transcription and secondary  
451 SARS-CoV-2 transmission in a series of hospital associated outbreaks in British Columbia from  
452 late 2020 to early 2021. Analysis shows that 98.6% of transmission pairs and 85% of primary  
453 cases had high nasopharyngeal *ACE2* transcription. Multivariable analysis adjusting for RNA  
454 viral load and interaction by case description found that nasopharyngeal *ACE2* transcription was  
455 positively associated with SARS-CoV-2 transmission in hospital patients but not health care  
456 workers. We postulate that use of masks among health care workers explains this difference,  
457 transmission from health care workers with high *ACE2* was interrupted by barrier protection.  
458 SARS-CoV-2 transmission remains a complex and unresolved phenomenon driven by biological,

459 environmental, and social risk factors. Differential nasopharyngeal ACE2 transcription has been  
460 observed in COVID-19 negative persons and having high- above average- expression of ACE2  
461 may serve as a risk factor for transmission of SARS-CoV-2.

462  
463  
464  
465  
466  
467  
468  
469  
470  
471  
472  
473  
474  
475  
476  
477  
478  
479  
480  
481

## 482 **References:**

- 483
- 484 1. Long, B.; Brady, W.J.; Koyfman, A.; Gottlieb, M. Cardiovascular Complications in  
485 COVID-19. *Am J Emerg Med* **2020**, *38*, 1504–1507, doi:10.1016/j.ajem.2020.04.048.
  - 486 2. Dhar, D.; Dey, T.; Samim, M.M.; Padmanabha, H.; Chatterjee, A.; Naznin, P.; Chandra,  
487 S.R.; Mallesh, K.; Shah, R.; Siddiqui, S.; et al. Systemic Inflammatory Syndrome in  
488 COVID-19–SISCOV Study: Systematic Review and Meta-Analysis. *Pediatr Res* **2022**, *91*,  
489 1334–1349, doi:10.1038/s41390-021-01545-z.
  - 490 3. Guo, T.; Fan, Y.; Chen, M.; Wu, X.; Zhang, L.; He, T.; Wang, H.; Wan, J.; Wang, X.; Lu,  
491 Z. Cardiovascular Implications of Fatal Outcomes of Patients With Coronavirus Disease  
492 2019 (COVID-19). *JAMA Cardiol* **2020**, *5*, 811, doi:10.1001/jamacardio.2020.1017.
  - 493 4. CHAN-YEUNG, M.; XU, R.-H. SARS: Epidemiology. *Respirology* **2003**, *8*, S9–S14,  
494 doi:10.1046/j.1440-1843.2003.00518.x.
  - 495 5. Zhang, A.-R.; Shi, W.-Q.; Liu, K.; Li, X.-L.; Liu, M.-J.; Zhang, W.-H.; Zhao, G.-P.; Chen,  
496 J.-J.; Zhang, X.-A.; Miao, D.; et al. Epidemiology and Evolution of Middle East  
497 Respiratory Syndrome Coronavirus, 2012–2020. *Infect Dis Poverty* **2021**, *10*, 66,  
498 doi:10.1186/s40249-021-00853-0.
  - 499 6. Singanayagam, A.; Hakki, S.; Dunning, J.; Madon, K.J.; Crone, M.A.; Koycheva, A.;  
500 Derqui-Fernandez, N.; Barnett, J.L.; Whitfield, M.G.; Varro, R.; et al. Community  
501 Transmission and Viral Load Kinetics of the SARS-CoV-2 Delta (B.1.617.2) Variant in  
502 Vaccinated and Unvaccinated Individuals in the UK: A Prospective, Longitudinal, Cohort  
503 Study. *Lancet Infect Dis* **2022**, *22*, 183–195, doi:10.1016/S1473-3099(21)00648-4.

- 504 7. Leung, N.H.L. Transmissibility and Transmission of Respiratory Viruses. *Nat Rev*  
505 *Microbiol* **2021**, *19*, 528–545, doi:10.1038/s41579-021-00535-6.
- 506 8. Lindsey, B.B.; Villabona-Arenas, Ch.J.; Campbell, F.; Keeley, A.J.; Parker, M.D.; Shah,  
507 D.R.; Parsons, H.; Zhang, P.; Kakkar, N.; Gallis, M.; et al. Characterising Within-Hospital  
508 SARS-CoV-2 Transmission Events Using Epidemiological and Viral Genomic Data  
509 across Two Pandemic Waves. *Nat Commun* **2022**, *13*, 671, doi:10.1038/s41467-022-  
510 28291-y.
- 511 9. Madewell, Z.J.; Yang, Y.; Longini, I.M.; Halloran, M.E.; Dean, N.E. Household  
512 Transmission of SARS-CoV-2. *JAMA Netw Open* **2020**, *3*, e2031756,  
513 doi:10.1001/jamanetworkopen.2020.31756.
- 514 10. Cowger, T.L.; Murray, E.J.; Clarke, J.; Bassett, M.T.; Ojikutu, B.O.; Sánchez, S.M.;  
515 Linos, N.; Hall, K.T. Lifting Universal Masking in Schools — Covid-19 Incidence among  
516 Students and Staff. *New England Journal of Medicine* **2022**,  
517 doi:10.1056/NEJMoa2211029.
- 518 11. Cordery, R.; Reeves, L.; Zhou, J.; Rowan, A.; Watber, P.; Rosadas, C.; Crone, M.; Storch,  
519 M.; Freemont, P.; Mosscrop, L.; et al. Transmission of SARS-CoV-2 by Children to  
520 Contacts in Schools and Households: A Prospective Cohort and Environmental Sampling  
521 Study in London. *Lancet Microbe* **2022**, *3*, e814–e823, doi:10.1016/S2666-  
522 5247(22)00124-0.
- 523 12. Li, F.; Li, W.; Farzan, M.; Harrison, S.C. Structure of SARS Coronavirus Spike Receptor-  
524 Binding Domain Complexed with Receptor. *Science (1979)* **2005**, *309*, 1864–1868,  
525 doi:10.1126/science.1116480.
- 526 13. Mannar, D.; Saville, J.W.; Zhu, X.; Srivastava, S.S.; Berezuk, A.M.; Tuttle, K.S.;  
527 Marquez, A.C.; Sekirov, I.; Subramaniam, S. SARS-CoV-2 Omicron Variant: Antibody  
528 Evasion and Cryo-EM Structure of Spike Protein–ACE2 Complex. *Science (1979)* **2022**,  
529 *375*, 760–764, doi:10.1126/science.abn7760.
- 530 14. Shang, J.; Ye, G.; Shi, K.; Wan, Y.; Luo, C.; Aihara, H.; Geng, Q.; Auerbach, A.; Li, F.  
531 Structural Basis of Receptor Recognition by SARS-CoV-2. *Nature* **2020**, *581*, 221–224,  
532 doi:10.1038/s41586-020-2179-y.
- 533 15. Meng, B.; Abdullahi, A.; Ferreira, I.A.T.M.; Goonawardane, N.; Saito, A.; Kimura, I.;  
534 Yamasoba, D.; Gerber, P.P.; Fatihi, S.; Rathore, S.; et al. Altered TMPRSS2 Usage by  
535 SARS-CoV-2 Omicron Impacts Infectivity and Fusogenicity. *Nature* **2022**, *603*, 706–714,  
536 doi:10.1038/s41586-022-04474-x.
- 537 16. Ziegler, C.G.K.; Allon, S.J.; Nyquist, S.K.; Mbano, I.M.; Miao, V.N.; Tzouanas, C.N.;  
538 Cao, Y.; Yousif, A.S.; Bals, J.; Hauser, B.M.; et al. SARS-CoV-2 Receptor ACE2 Is an  
539 Interferon-Stimulated Gene in Human Airway Epithelial Cells and Is Detected in Specific  
540 Cell Subsets across Tissues. *Cell* **2020**, *181*, 1016–1035.e19,  
541 doi:10.1016/j.cell.2020.04.035.
- 542 17. Sui, Y.; Li, J.; Venzon, D.J.; Berzofsky, J.A. SARS-CoV-2 Spike Protein Suppresses  
543 ACE2 and Type I Interferon Expression in Primary Cells From Macaque Lung  
544 Bronchoalveolar Lavage. *Front Immunol* **2021**, *12*, doi:10.3389/fimmu.2021.658428.
- 545 18. Verdecchia, P.; Cavallini, C.; Spanevello, A.; Angeli, F. The Pivotal Link between ACE2  
546 Deficiency and SARS-CoV-2 Infection. *Eur J Intern Med* **2020**, *76*, 14–20,  
547 doi:10.1016/j.ejim.2020.04.037.

- 548 19. Groß, S.; Jahn, C.; Cushman, S.; Bär, C.; Thum, T. SARS-CoV-2 Receptor ACE2-  
549 Dependent Implications on the Cardiovascular System: From Basic Science to Clinical  
550 Implications. *J Mol Cell Cardiol* **2020**, *144*, 47–53, doi:10.1016/j.yjmcc.2020.04.031.
- 551 20. Jia, H.P.; Look, D.C.; Shi, L.; Hickey, M.; Pewe, L.; Netland, J.; Farzan, M.; Wohlford-  
552 Lenane, C.; Perlman, S.; McCray, P.B. ACE2 Receptor Expression and Severe Acute  
553 Respiratory Syndrome Coronavirus Infection Depend on Differentiation of Human  
554 Airway Epithelia. *J Virol* **2005**, *79*, 14614–14621, doi:10.1128/JVI.79.23.14614-  
555 14621.2005.
- 556 21. Ni, W.; Yang, X.; Yang, D.; Bao, J.; Li, R.; Xiao, Y.; Hou, C.; Wang, H.; Liu, J.; Yang,  
557 D.; et al. Role of Angiotensin-Converting Enzyme 2 (ACE2) in COVID-19. *Crit Care*  
558 **2020**, *24*, 422, doi:10.1186/s13054-020-03120-0.
- 559 22. Ziegler, C.G.K.; Allon, S.J.; Nyquist, S.K.; Mbano, I.M.; Miao, V.N.; Tzouanas, C.N.;  
560 Cao, Y.; Yousif, A.S.; Bals, J.; Hauser, B.M.; et al. SARS-CoV-2 Receptor ACE2 Is an  
561 Interferon-Stimulated Gene in Human Airway Epithelial Cells and Is Detected in Specific  
562 Cell Subsets across Tissues. *Cell* **2020**, *181*, 1016-1035.e19,  
563 doi:10.1016/j.cell.2020.04.035.
- 564 23. Nikiforuk, A.M.; Kuchinski, K.S.; Twa, D.D.W.; Lukac, C.D.; Sbihi, H.; Basham, C.A.;  
565 Steidl, C.; Prystajecy, N.A.; Jassem, A.N.; Krajden, M.; et al. The Contrasting Role of  
566 Nasopharyngeal Angiotensin Converting Enzyme 2 (ACE2) Transcription in SARS-CoV-  
567 2 Infection: A Cross-Sectional Study of People Tested for COVID-19 in British  
568 Columbia, Canada. *EBioMedicine* **2021**, *66*, 103316, doi:10.1016/j.ebiom.2021.103316.
- 569 24. Freed, N.E.; Vlková, M.; Faisal, M.B.; Silander, O.K. Rapid and Inexpensive Whole-  
570 Genome Sequencing of SARS-CoV-2 Using 1200 Bp Tiled Amplicons and Oxford  
571 Nanopore Rapid Barcoding. *Biol Methods Protoc* **2020**, *5*,  
572 doi:10.1093/biomethods/bpaa014.
- 573 25. Messmann, R.; Dietl, A.; Wagner, S.; Domenig, O.; Jungbauer, C.; Luchner, A.; Maier,  
574 L.S.; Schopka, S.; Hirt, S.; Schmid, C.; et al. Alterations of the Renin Angiotensin System  
575 in Human End-Stage Heart Failure before and after Mechanical Cardiac Unloading by  
576 LVAD Support. *Mol Cell Biochem* **2020**, *472*, 79–94, doi:10.1007/s11010-020-03787-7.
- 577 26. LeBlanc, J.J.; Gubbay, J.B.; Li, Y.; Needle, R.; Arneson, S.R.; Marcino, D.; Charest, H.;  
578 Desnoyers, G.; Dust, K.; Fattouh, R.; et al. Real-Time PCR-Based SARS-CoV-2  
579 Detection in Canadian Laboratories. *Journal of Clinical Virology* **2020**, *128*, 104433,  
580 doi:10.1016/j.jcv.2020.104433.
- 581 27. Nikiforuk, A.M.; Kuchinski, K.S.; Twa, D.D.W.; Lukac, C.D.; Sbihi, H.; Basham, C.A.;  
582 Steidl, C.; Prystajecy, N.A.; Jassem, A.N.; Krajden, M.; et al. The Contrasting Role of  
583 Nasopharyngeal Angiotensin Converting Enzyme 2 (ACE2) Transcription in SARS-CoV-  
584 2 Infection: A Cross-Sectional Study of People Tested for COVID-19 in British  
585 Columbia, Canada. *EBioMedicine* **2021**, *66*, 103316, doi:10.1016/j.ebiom.2021.103316.
- 586 28. Livak, K.J.; Schmittgen, T.D. Analysis of Relative Gene Expression Data Using Real-  
587 Time Quantitative PCR and the  $2^{-\Delta\Delta CT}$  Method. *Methods* **2001**, *25*, 402–408,  
588 doi:10.1006/meth.2001.1262.
- 589 29. British Columbia Centre for Disease Control Ncov2019-Artic-Nf (accessed on 22  
590 November 2022).
- 591 30. O’Toole, Á.; Scher, E.; Underwood, A.; Jackson, B.; Hill, V.; McCrone, J.T.; Colquhoun,  
592 R.; Ruis, C.; Abu-Dahab, K.; Taylor, B.; et al. Assignment of Epidemiological Lineages in

- 593 an Emerging Pandemic Using the Pangolin Tool. *Virus Evol* **2021**,  
594 doi:10.1093/ve/veab064.
- 595 31. VanderWeele, T.J. Principles of Confounder Selection. *Eur J Epidemiol* **2019**, *34*, 211–  
596 219, doi:10.1007/s10654-019-00494-6.
- 597 32. Gutiérrez-Chamorro, L.; Riveira-Muñoz, E.; Barrios, C.; Palau, V.; Nevot, M.; Pedreño-  
598 López, S.; Senserrich, J.; Massanella, M.; Clotet, B.; Cabrera, C.; et al. SARS-CoV-2  
599 Infection Modulates ACE2 Function and Subsequent Inflammatory Responses in Swabs  
600 and Plasma of COVID-19 Patients. *Viruses* **2021**, *13*, 1715, doi:10.3390/v13091715.
- 601 33. Marc, A.; Kerioui, M.; Blanquart, F.; Bertrand, J.; Mitjà, O.; Corbacho-Monné, M.;  
602 Marks, M.; Guedj, J. Quantifying the Relationship between SARS-CoV-2 Viral Load and  
603 Infectiousness. *Elife* **2021**, *10*, doi:10.7554/eLife.69302.
- 604 34. Carraturo, F.; del Giudice, C.; Morelli, M.; Cerullo, V.; Libralato, G.; Galdiero, E.; Guida,  
605 M. Persistence of SARS-CoV-2 in the Environment and COVID-19 Transmission Risk  
606 from Environmental Matrices and Surfaces. *Environmental Pollution* **2020**, *265*, 115010,  
607 doi:10.1016/j.envpol.2020.115010.
- 608 35. Onweni, C.L.; Zhang, Y.S.; Caulfield, T.; Hopkins, C.E.; Fairweather, D.L.; Freeman,  
609 W.D. ACEI/ARB Therapy in COVID-19: The Double-Edged Sword of ACE2 and SARS-  
610 CoV-2 Viral Docking. *Crit Care* **2020**, *24*, 475, doi:10.1186/s13054-020-03195-9.
- 611 36. Kwak, S.G.; Kim, J.H. Central Limit Theorem: The Cornerstone of Modern Statistics.  
612 *Korean J Anesthesiol* **2017**, *70*, 144, doi:10.4097/kjae.2017.70.2.144.
- 613 37. Alene, M.; Yismaw, L.; Assemie, M.A.; Ketema, D.B.; Gietaneh, W.; Birhan, T.Y. Serial  
614 Interval and Incubation Period of COVID-19: A Systematic Review and Meta-Analysis.  
615 *BMC Infect Dis* **2021**, *21*, 257, doi:10.1186/s12879-021-05950-x.
- 616 38. Byrne, A.W.; McEvoy, D.; Collins, A.B.; Hunt, K.; Casey, M.; Barber, A.; Butler, F.;  
617 Griffin, J.; Lane, E.A.; McAloon, C.; et al. Inferred Duration of Infectious Period of  
618 SARS-CoV-2: Rapid Scoping Review and Analysis of Available Evidence for  
619 Asymptomatic and Symptomatic COVID-19 Cases. *BMJ Open* **2020**, *10*, e039856,  
620 doi:10.1136/bmjopen-2020-039856.
- 621 39. Craney, T.A.; Surlles, J.G. Model-Dependent Variance Inflation Factor Cutoff Values.  
622 *Qual Eng* **2002**, *14*, 391–403, doi:10.1081/QEN-120001878.
- 623 40. Cameron, A.C.; Trivedi, P.K. Regression-Based Tests for Overdispersion in the Poisson  
624 Model. *J Econom* **1990**, *46*, 347–364, doi:10.1016/0304-4076(90)90014-K.
- 625 41. van den Broek, J. A Score Test for Zero Inflation in a Poisson Distribution. *Biometrics*  
626 **1995**, *51*, 738–743.
- 627 42. Portet, S. A Primer on Model Selection Using the Akaike Information Criterion. *Infect Dis*  
628 *Model* **2020**, *5*, 111–128, doi:10.1016/j.idm.2019.12.010.
- 629 43. R Core Team R: A Language and Environment for Statistical Computing. 2013.
- 630 44. Keeling, M.J.; Eames, K.T.D. Networks and Epidemic Models. *J R Soc Interface* **2005**, *2*,  
631 295–307, doi:10.1098/rsif.2005.0051.
- 632 45. Public Health Agency of Canada Infection Prevention and Control for COVID-19: Interim  
633 Guidance for Acute Healthcare Settings.
- 634 46. Vincent, M.; Edwards, P. Disposable Surgical Face Masks for Preventing Surgical Wound  
635 Infection in Clean Surgery. *Cochrane Database of Systematic Reviews* **2016**, *2016*,  
636 doi:10.1002/14651858.CD002929.pub3.
- 637 47. Leung, N.H.L.; Chu, D.K.W.; Shiu, E.Y.C.; Chan, K.-H.; McDevitt, J.J.; Hau, B.J.P.;  
638 Yen, H.-L.; Li, Y.; Ip, D.K.M.; Peiris, J.S.M.; et al. Respiratory Virus Shedding in

- 639 Exhaled Breath and Efficacy of Face Masks. *Nat Med* **2020**, *26*, 676–680,  
640 doi:10.1038/s41591-020-0843-2.
- 641 48. Andrejko, K.L.; Pry, J.; Myers, J.F.; Openshaw, J.; Watt, J.; Birkett, N.; DeGuzman, J.L.;  
642 Barbaduomo, C.M.; Dong, Z.N.; Fang, A.T.; et al. Predictors of Severe Acute Respiratory  
643 Syndrome Coronavirus 2 Infection Following High-Risk Exposure. *Clinical Infectious*  
644 *Diseases* **2022**, *75*, e276–e288, doi:10.1093/cid/ciab1040.
- 645 49. Fennelly, K.P. Particle Sizes of Infectious Aerosols: Implications for Infection Control.  
646 *Lancet Respir Med* **2020**, *8*, 914–924, doi:10.1016/S2213-2600(20)30323-4.
- 647 50. Cowger, T.L.; Murray, E.J.; Clarke, J.; Bassett, M.T.; Ojikutu, B.O.; Sánchez, S.M.;  
648 Linos, N.; Hall, K.T. Lifting Universal Masking in Schools — Covid-19 Incidence among  
649 Students and Staff. *New England Journal of Medicine* **2022**, *387*, 1935–1946,  
650 doi:10.1056/NEJMoa2211029.
- 651 51. Loeb, M.; Bartholomew, A.; Hashmi, M.; Tarhuni, W.; Hassany, M.; Youngster, I.;  
652 Somayaji, R.; Larios, O.; Kim, J.; Missaghi, B.; et al. Medical Masks Versus N95  
653 Respirators for Preventing COVID-19 Among Health Care Workers. *Ann Intern Med*  
654 **2022**, *175*, 1629–1638, doi:10.7326/M22-1966.
- 655 52. Wang, C.C.; Prather, K.A.; Sznitman, J.; Jimenez, J.L.; Lakdawala, S.S.; Tufekci, Z.;  
656 Marr, L.C. Airborne Transmission of Respiratory Viruses. *Science (1979)* **2021**, *373*,  
657 doi:10.1126/science.abd9149.
- 658 53. Hou, Y.J.; Okuda, K.; Edwards, C.E.; Martinez, D.R.; Asakura, T.; Dinnon, K.H.; Kato,  
659 T.; Lee, R.E.; Yount, B.L.; Mascenik, T.M.; et al. SARS-CoV-2 Reverse Genetics Reveals  
660 a Variable Infection Gradient in the Respiratory Tract. *Cell* **2020**, *182*, 429–446.e14,  
661 doi:10.1016/j.cell.2020.05.042.
- 662 54. Kimura, H.; Francisco, D.; Conway, M.; Martinez, F.D.; Vercelli, D.; Polverino, F.;  
663 Billheimer, D.; Kraft, M. Type 2 Inflammation Modulates ACE2 and TMPRSS2 in  
664 Airway Epithelial Cells. *Journal of Allergy and Clinical Immunology* **2020**, *146*, 80–88.e8,  
665 doi:10.1016/j.jaci.2020.05.004.
- 666 55. Takabayashi, T.; Yoshida, K.; Imoto, Y.; Schleimer, R.P.; Fujieda, S. Regulation of the  
667 Expression of SARS-CoV-2 Receptor Angiotensin-Converting Enzyme 2 in Nasal  
668 Mucosa. *Am J Rhinol Allergy* **2022**, *36*, 115–122, doi:10.1177/19458924211027798.
- 669 56. Westreich, D. Berkson’s Bias, Selection Bias, and Missing Data. *Epidemiology* **2012**, *23*,  
670 159–164, doi:10.1097/EDE.0b013e31823b6296.

671

672

### 673 **Ethical Approval:**

674 Ethical approval for the study was sought from the University of British Columbia human  
675 ethics board (#H20-01110) which was harmonized with the Fraser Health Authority. Written  
676 informed consent was not required. All data was de-identified prior to analysis and the results  
677 were not linked back to any identifying records. This study was deemed as minimal risk to the  
678 participants involved. To ensure privacy the site of the outbreak series will not be disclosed.

679

### 680 **Funding:**

681 This work was funded by the Canadian Institutes of Health Research (#434951) and  
682 Genome British Columbia (COV-55).

683

### 684 **Competing Interests:**

685 The authors have no conflicts of interest to declare.

686

687 **Author Contributions:**

688 A.M.N., K.S.K., K.S. and I.S. conceived and designed the study. Epidemiological  
689 reporting, data recording and stewardship was performed by K.S. and S.R. Laboratory data  
690 reporting and stewardship was performed by N.P. and A.N.J. Laboratory measurements were  
691 taken by A.M.N and K.S.K. Data analysis was performed by A.M.N and K.S.K., D.M.P and  
692 M.A.I assisted in interpretation of the results. The manuscript was written by A.M.N, all authors  
693 helped with editing and provided their approval for publication.

694

695

696

697

698

699

700

701

702

703

704

705

706

707

708 **Table 1:** Characteristics of analytic data stratified by case designation (n = 103).

| Variable                       | Level   | Health Care | Patient     | P-Value |
|--------------------------------|---------|-------------|-------------|---------|
|                                |         | Worker      |             |         |
|                                |         | n = 46      | n = 57      |         |
| Age (mean (SD))                |         | 41.1 (10.3) | 78.6 (12.1) | <0.001  |
| Biological Sex (%)             | Female  | 41.0 (89.1) | 33.0 (57.9) | 0.001   |
|                                | Male    | 5.00 (10.9) | 24.0 (42.1) |         |
| ACE2 Transcription (mean (SD)) |         | 2.11 (2.88) | 2.00 (3.06) | 0.861   |
| RNA Viral Load (mean (SD))     |         | 6.94 (1.79) | 7.33 (1.98) | 0.300   |
| Viral Lineage (%)              |         |             |             | 0.385   |
|                                | AL.1    | 28.0 (60.9) | 27.0 (47.4) |         |
|                                | B.1.128 | 0.00 (0.00) | 1.00 (1.80) |         |



|           |             |             |
|-----------|-------------|-------------|
| B.1.2     | 14.0 (30.4) | 25 (43.9)   |
| B.1.279   | 0.00 (0.00) | 2.00 (3.50) |
| B.1.36    | 2.00 (4.30) | 1.00 (1.80) |
| B.1.36.36 | 1.00 (2.20) | 0.00 (0.00) |
| B.1.36.38 | 1.00 (2.20) | 0.00 (0.00) |

709 Variables included in the study are stratified by case designation health care worker or patient. P-values for  
 710 parametric statistical test performed on continuous (t-test) or categorical data ( $X^2$  test) are reported. Viral lineage  
 711 calls are from whole genome sequencing data classified using the PANGOLIN tool (Version 1.15.1). Data is also  
 712 available stratified by ‘High’ or ‘Low’ nasopharyngeal ACE2 transcription (Table S1).

713  
 714  
 715  
 716  
 717  
 718  
 719  
 720  
 721  
 722  
 723  
 724

**Table 2:** Multivariable analysis of the relationship between ACE2 transcription and the number of SARS-CoV-2 secondary cases.

| <b>Multivariable Regression Models</b>                                                                                    |                                                                             |                                                |                                      |
|---------------------------------------------------------------------------------------------------------------------------|-----------------------------------------------------------------------------|------------------------------------------------|--------------------------------------|
| <i>(Secondary Cases ~ ACE2 Transcription + RNA Viral Load + Case Description + ACE2 Transcription : Case Description)</i> |                                                                             |                                                |                                      |
| <b>Beta Coefficients</b><br><i>(95% CI)</i>                                                                               | <b>Poisson</b>                                                              | <b>Quasi-Poisson</b>                           | <b>Negative Binomial (NB)</b>        |
| ACE2 Transcription in HCW                                                                                                 | -0.164<br><i>(-0.236- [-0.0919])</i>                                        | -0.164<br><i>(-0.273-[-0.0528])</i>            | -0.132<br><i>(-0.255- [-0.0181])</i> |
| RNA Viral Load                                                                                                            | $2.73 \times 10^{-3}$<br><i>(<math>5.34 \times 10^{-3} - 0.0976</math>)</i> | $2.73 \times 10^{-3}$<br><i>(-0.141-0.150)</i> | -0.0197<br><i>(-0.164- [0.123])</i>  |
| Case (Patient)                                                                                                            | -0.808<br><i>(-1.20- [-0.421])</i>                                          | -0.808<br><i>(-1.43- [-0.235])</i>             | -0.782<br><i>(-1.42- [-0.162])</i>   |

|                                |                         |                         |                          |
|--------------------------------|-------------------------|-------------------------|--------------------------|
| ACE2 Transcription in Patients | 0.208<br>(0.0958-0.320) | 0.208<br>(0.0382-0.382) | 0.187<br>(0.01011-0.370) |
| AIC                            | 394                     | --                      | 346                      |
| Theta                          | 2.44                    | 2.44                    | 0.922                    |
| Score Test (P Value)           | P < 0.001               | --                      | P = 0.976                |

725

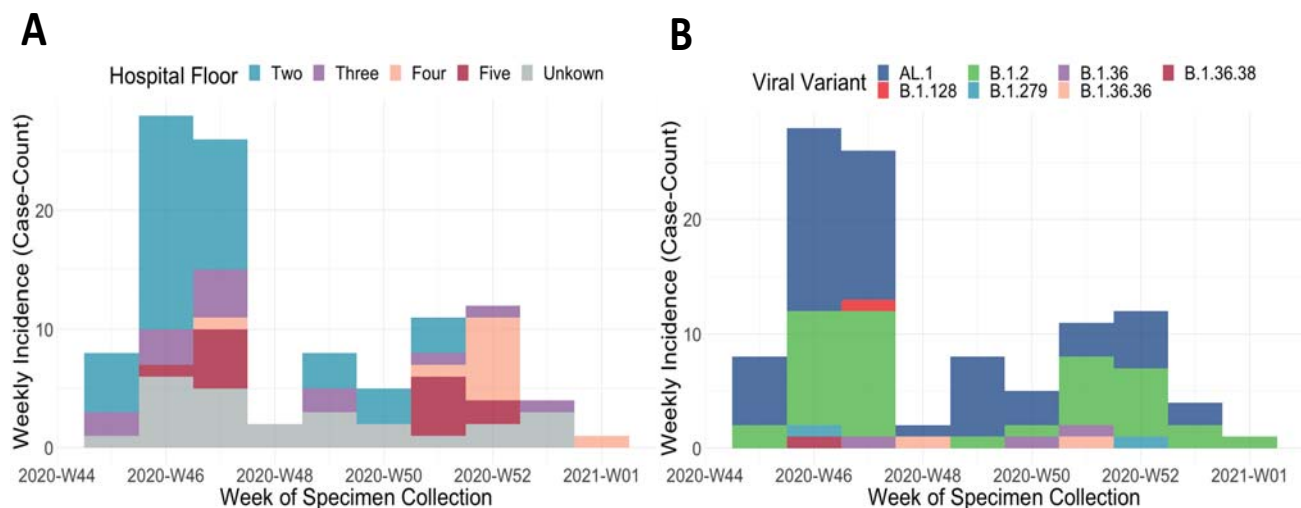

726

727

728

729 **Figure 1: Incidence curve of several hospital associated SARS-CoV-2 outbreaks in British Columbia by**  
 730 **epidemiological week from 07-11-2020 to 04-01-2021 (n = 103 laboratory confirmed cases).** SARS-CoV-2  
 731 incidence follows a non-normal distribution where an initial peak caseload was observed in W46-2020 and a second  
 732 lesser case surge occurred in W52-2020. **A)** SARS-CoV-2 cases are stratified by hospital floor, early in the  
 733 surveillance period transmission occurred mostly on floor number two and later moved to floors four and five. If the  
 734 floor where transmission occurred was not determined by the investigating epidemiologist, then it was coded as  
 735 'unknown' for our analysis. **B)** SARS-CoV-2 cases are stratified by viral variant, n = 7 unique SARS-CoV-2  
 736 variants were identified by whole genome sequencing participants diagnostic specimens. SARS-CoV-2 variants  
 737 AL.1 and B.1.2 caused the highest percentage of cases: AL.1, 55/103, 53% and B.1.2, 39/103, 38%.

738

739

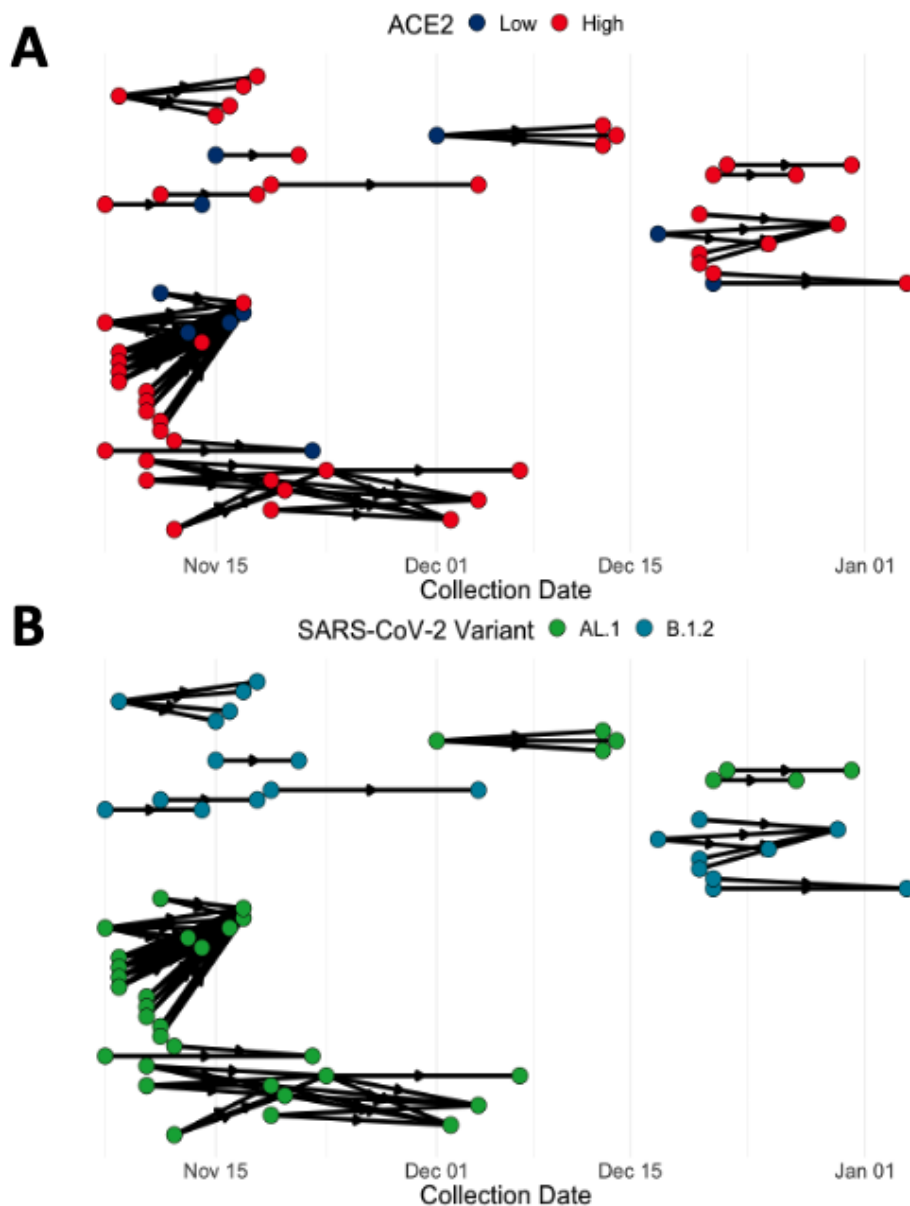

740  
741 **Figure 2: Infection tracing transmission network analysis of a series of hospital associated SARS-CoV-2**  
742 **outbreaks in British Columbia by epidemiological week from 07-11-2020 to 04-01-2021 (n = 103 laboratory**  
743 **confirmed cases).** Nodes represent confirmed cases while the edge show the direction of outgoing transmission, link  
744 a primary case with at least one secondary case. **A)** Nodes in the transmission network are stratified by ACE2  
745 transcription (high or low), 82% of cases (84/103) had above average, high ACE2 transcription ( $P < 0.001$ ). **B)**  
746 Nodes in the transmission network are classified by SARS-CoV-2 viral variant. The viral variants AL.1 and B.1.2  
747 caused multiple secondary infections thorough the outbreaks, in the first phase (before Dec.15<sup>th</sup>, 2020) of the study  
748 period most cases were AL.1 and later transitioned to B.1.2 in phase two (after Dec.15<sup>th</sup>, 2020).  
749

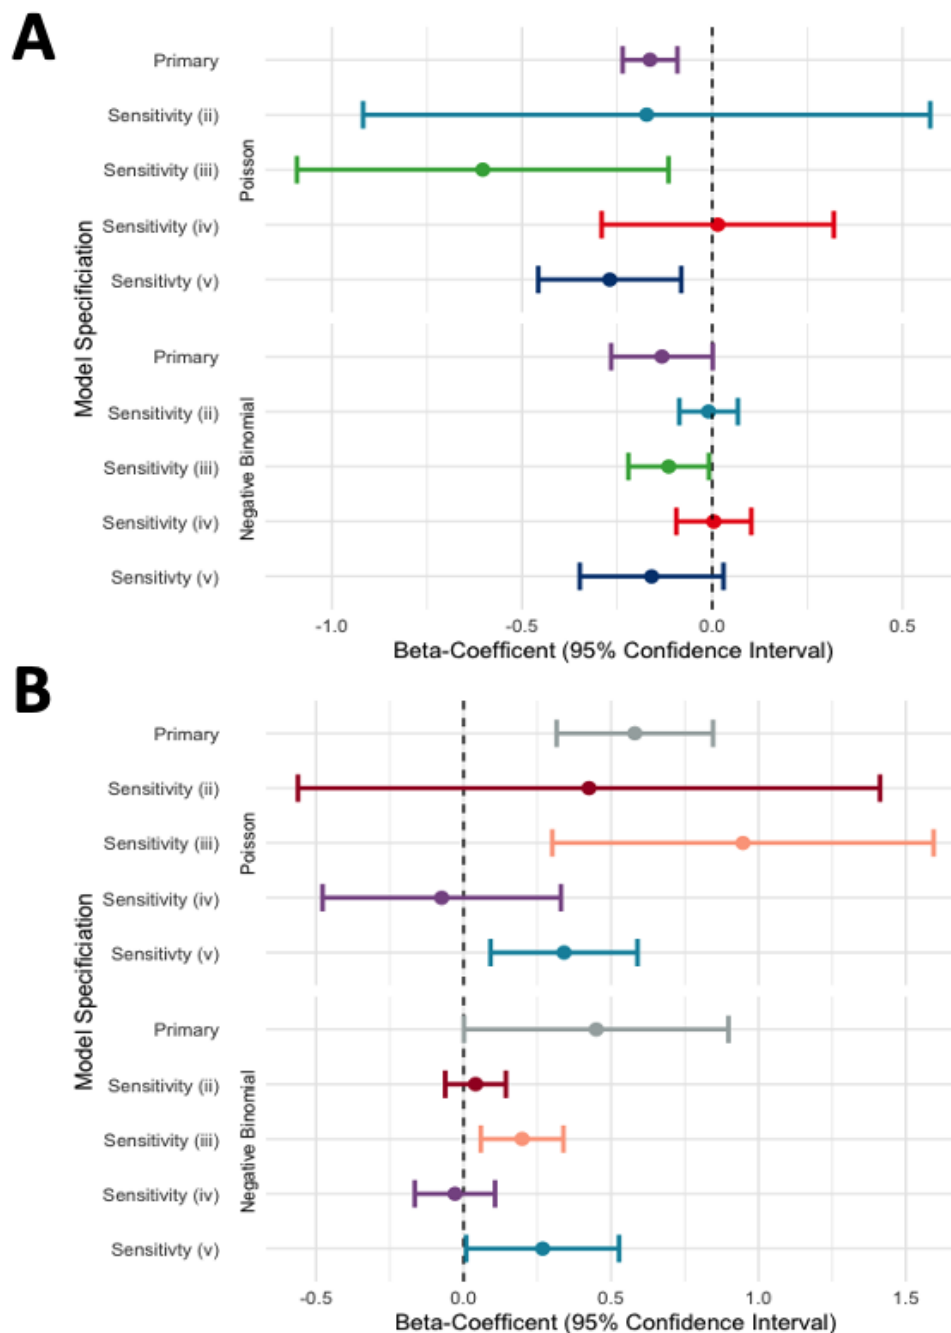

750  
 751 **Figure 3: Forest plot of point estimates from the association between nasopharyngeal *ACE2* transcription of**  
 752 **the primary case and the SARS-CoV-2 secondary cases.** Poisson and Negative Binomial (NB) regression models  
 753 were used for the primary analysis and sensitivity analysis of the assumptions used to construct the infection tracing  
 754 networks. **A)** Beta-coefficients and ninety-five percent confidence intervals for the association between  
 755 nasopharyngeal *ACE2* transcription and secondary cases within health care workers, adjusting for viral load. The  
 756 best fit NB model shows no association in the primary analysis or sensitivity analysis (ii, iv or v). A significant  
 757 association between nasopharyngeal *ACE2* transcription and the number of SARS-CoV-2 secondary cases was  
 758 found for healthcare workers in sensitivity analysis iii, where the serial interval of 5.6 days was not used to build the  
 759 transmission network. **B)** Beta-coefficients and ninety-five percent confidence intervals for the association between  
 760 nasopharyngeal *ACE2* transcription and secondary cases within patients, adjusting for viral load. The best fit NB  
 761 model finds a positive association between in the primary analysis, and sensitivity analysis iii, and v. No association  
 762 between nasopharyngeal *ACE2* transcription and the number of SARS-CoV-2 secondary cases was found for

763 patients in sensitivity analysis ii and iv, where assumptions of transmission occurring within hospital units and a  
764 15.6-day infectious period were excluded from constructing the transmission network, respectively.
